# Supplementary material for: Importance of variables from different time frames for predicting self-harm using health system data
Source: PubMed Central journal article supplement — medRxiv. 2024 Sep 20:2024.04.29.24306260. Preprint. [Version 2] doi: 10.1101/2024.04.29.24306260 (PMC11451820; doi:10.1101/2024.04.29.24306260), 2024-09-20
Supplement: NIHPP2024.04.29.24306260v2-supplement-1.pdf [file NIHPP2024.04.29.24306260v2-supplement-1.pdf]

## Supplementary material

### SETTING THE X-AXIS SCALE FOR FIGURES (UNSTRATIFIED ANALYSIS)

For each combination of visit type and outcome, we calculated the maximum achievable variable importance using the performance of the full model including predictors from all time periods. For AUC, the maximum achievable importance is the difference between the AUC of the full model and 0.5 (the AUC of a null model). For sensitivity at a given cut-point, the maximum importance is the difference between the sensitivity of the full model and the proportion of visits flagged using that cut-point. For PPV, the maximum importance is the difference between the PPV of the full model and the overall event rate. In each figure, the upper limit of the  $x$ -axis is set to the maximum achievable importance.

### VARIABLE IMPORTANCE WITHIN SUBGROUPS

In addition to the primary analyses in the four outcome-setting pairs, we also performed analyses in subgroups defined by self-reported race and ethnicity. Due to the small number of suicide deaths in some subgroups, we performed stratified analyses only for self-harm, in both mental health and general medical settings. Race/ethnicity categories included White, Hispanic, Black/African American, Asian, American Indian/Alaskan Native, Native Hawaiian/Pacific Islander, multiracial or other race, and no race or ethnicity recorded. For each outcome-setting pair, penalized regression models were fit using all visits. Subgroup-specific estimates of predictiveness were then computed using only visits corresponding to that subgroup. For sensitivity and specificity, subgroup-specific risk score quantiles were used.

Performance of risk prediction models using predictors from all time periods is reported in Tables S3 and S4 Variable importance estimates are shown in Figures S5–S8.

### SUPPLEMENTARY TABLES AND FIGURES

| Health system                         | Data start date               | Last date with complete cause of death data <sup>a</sup> |
|---------------------------------------|-------------------------------|----------------------------------------------------------|
| HealthPartners                        | January 1, 2009               | December 31, 2016                                        |
| Henry Ford Health                     | December 1, 2012 <sup>b</sup> | December 31, 2015                                        |
| Kaiser Permanente Colorado            | January 1, 2009               | December 31, 2017                                        |
| Kaiser Permanente Hawaii              | January 1, 2009               | December 31, 2016                                        |
| Kaiser Permanente Northwest           | January 1, 2009               | December 31, 2016                                        |
| Kaiser Permanente Southern California | January 1, 2009               | December 31, 2016                                        |
| Kaiser Permanente Washington          | January 1, 2009               | December 31, 2016                                        |

**Table S1:** Data availability dates for participating sites.

<sup>a</sup>The study sample includes visits up to September 30 of the year with complete capture of cause of death data to allow for 90 days follow-up after mental health visits. For example, visits through September 30, 2016 are included for health systems with cause of death data complete through December 31, 2016.

<sup>b</sup>Only visits that occurred after the implementation of a new electronic health records system at Henry Ford were included in the sample.

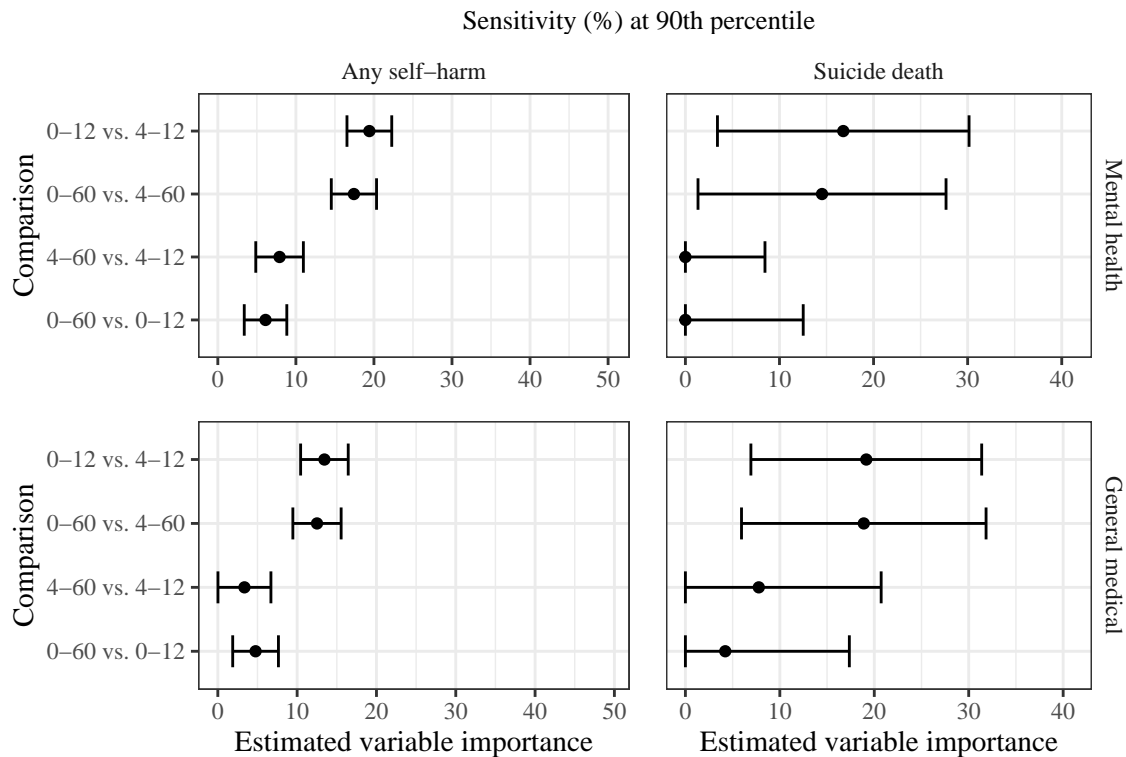

**Figure S1:** Estimated variable importance for temporal predictor groups in terms of **sensitivity at the 90th percentile** of risk scores. Note the different *x*-axis scales for each outcome-setting pair, which are based on the estimated maximum possible variable importance (see Supplementary Material for details).

| Base predictors                                            |                                                        |
|------------------------------------------------------------|--------------------------------------------------------|
| Age                                                        | Sex                                                    |
| Race                                                       | Hispanic ethnicity                                     |
| Medicaid coverage at visit                                 | Commercial insurance coverage at visit                 |
| Private pay insurance at visit                             | State-subsidized insurance at visit                    |
| Self-funded insurance at visit                             | Medicare insurance at visit                            |
| Other insurance at visit                                   | High-deductible insurance at visit                     |
| Median household income <\$25k at visit (census-based)     | Median household income <\$40k at visit (census-based) |
| Neighborhood <25% college educated at visit (census-based) |                                                        |
| Temporal predictors <sup>a</sup>                           |                                                        |
| Depression diagnosis                                       | Anxiety diagnosis                                      |
| Bipolar diagnosis                                          | Schizophrenia diagnosis                                |
| Other psychological disorder diagnosis                     | Dementia diagnosis                                     |
| ADD diagnosis                                              | ASD diagnosis                                          |
| Personality disorder diagnosis                             | Alcohol use disorder diagnosis                         |
| Drug use disorder diagnosis                                | PTSD diagnosis                                         |
| Eating disorder diagnosis                                  | Traumatic brain injury diagnosis                       |
| Antidepressant prescription fill                           | Benzodiazepine prescription fill                       |
| Hypnotic prescription fill                                 | Second generation antipsychotic prescription fill      |
| Inpatient encounter with MH diagnosis                      | Outpatient MH specialty visit                          |
| Emergency/urgent care encounter MH diagnosis               | Any self-inflicted injury/poisoning                    |
| Self-inflicted lacerative violent injury                   | Other self-inflicted violent injury                    |
| Any injury/poisoning diagnosis                             | Natal delivery diagnosis                               |
| Modal PHQ9 9th item response                               | Maximum PHQ9 9th item response                         |
| Number of PHQ9 9th item responses                          |                                                        |

**Table S2:** Overview of variables included in prediction models. MH: mental health.

<sup>a</sup>Each temporal predictor is a binary indicator of presence/absence in 0–3 months, 3 months – 1 year, or 1–5 years prior to the index visit.

|                                  | AUC   | Sensitivity (%)        |                        |                        |
|----------------------------------|-------|------------------------|------------------------|------------------------|
|                                  |       | 90 <sup>th</sup> perc. | 95 <sup>th</sup> perc. | 99 <sup>th</sup> perc. |
| American Indian/Alaska Native    | 0.846 | 58.1                   | 41.6                   | 11.6                   |
| Asian                            | 0.840 | 56.6                   | 42.9                   | 16.3                   |
| Black/African American           | 0.827 | 53.9                   | 40.6                   | 16.4                   |
| Native Hawaiian/Pacific Islander | 0.802 | 49.6                   | 37.3                   | 16.7                   |
| White                            | 0.854 | 61.1                   | 46.1                   | 19.2                   |
| Multiple or other races          | 0.849 | 55.9                   | 45.0                   | 20.1                   |
| Hispanic                         | 0.851 | 58.7                   | 44.0                   | 18.8                   |
| No race/ethnicity indicated      | 0.807 | 55.0                   | 42.4                   | 18.0                   |

**Table S3:** Performance of any self-harm (fatal and non-fatal) prediction models including predictors from all time periods in the mental health setting.

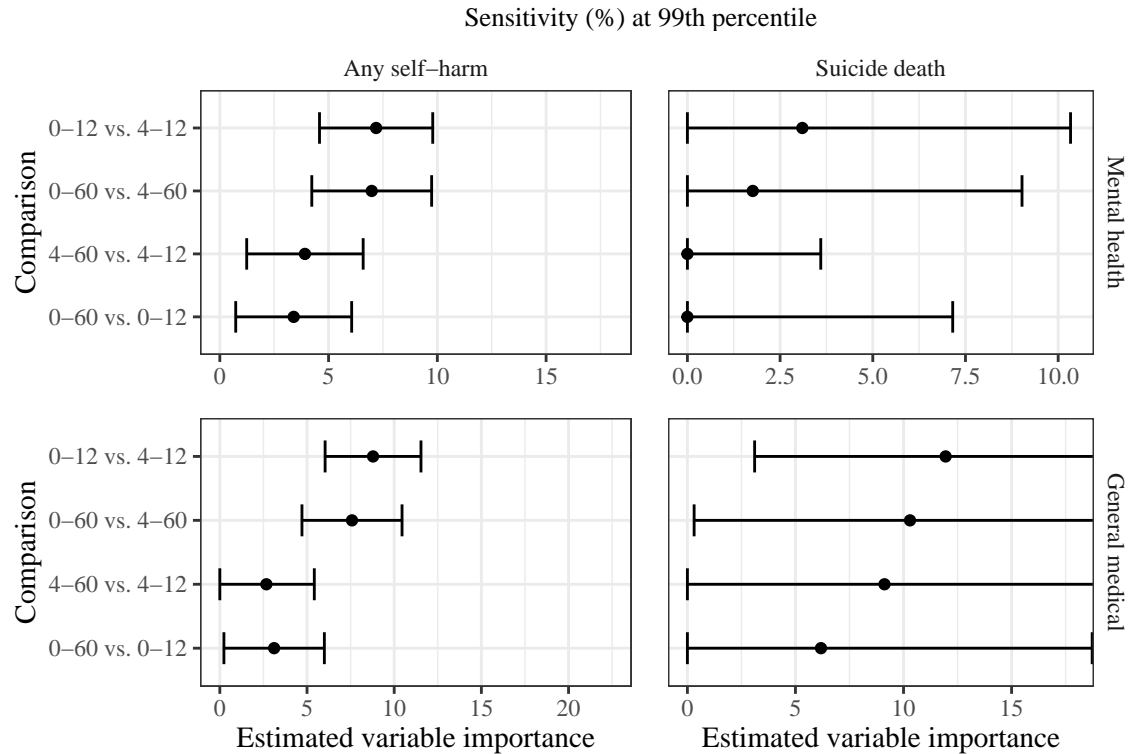

**Figure S2:** Estimated variable importance for temporal predictor groups in terms of **sensitivity at the 99th percentile** of risk scores. Note the different *x*-axis scales for each outcome-setting pair, which are based on the estimated maximum possible variable importance (see Supplementary Material for details).

|                                  | AUC   | Sensitivity (%)        |                        |                        |
|----------------------------------|-------|------------------------|------------------------|------------------------|
|                                  |       | 90 <sup>th</sup> perc. | 95 <sup>th</sup> perc. | 99 <sup>th</sup> perc. |
| American Indian/Alaska Native    | 0.845 | 61.1                   | 49.4                   | 14.1                   |
| Asian                            | 0.808 | 55.6                   | 44.8                   | 22.5                   |
| Black/African American           | 0.831 | 58.4                   | 42.9                   | 20.8                   |
| Native Hawaiian/Pacific Islander | 0.820 | 54.5                   | 34.5                   | 17.9                   |
| White                            | 0.829 | 59.5                   | 47.3                   | 24.2                   |
| Multiple or other races          | 0.798 | 50.9                   | 42.2                   | 28.1                   |
| Hispanic                         | 0.839 | 60.8                   | 48.2                   | 23.2                   |
| No race/ethnicity indicated      | 0.810 | 58.2                   | 47.3                   | 20.4                   |

**Table S4:** Performance of any self-harm (fatal and non-fatal) prediction models including predictors from all time periods in the general medical setting.

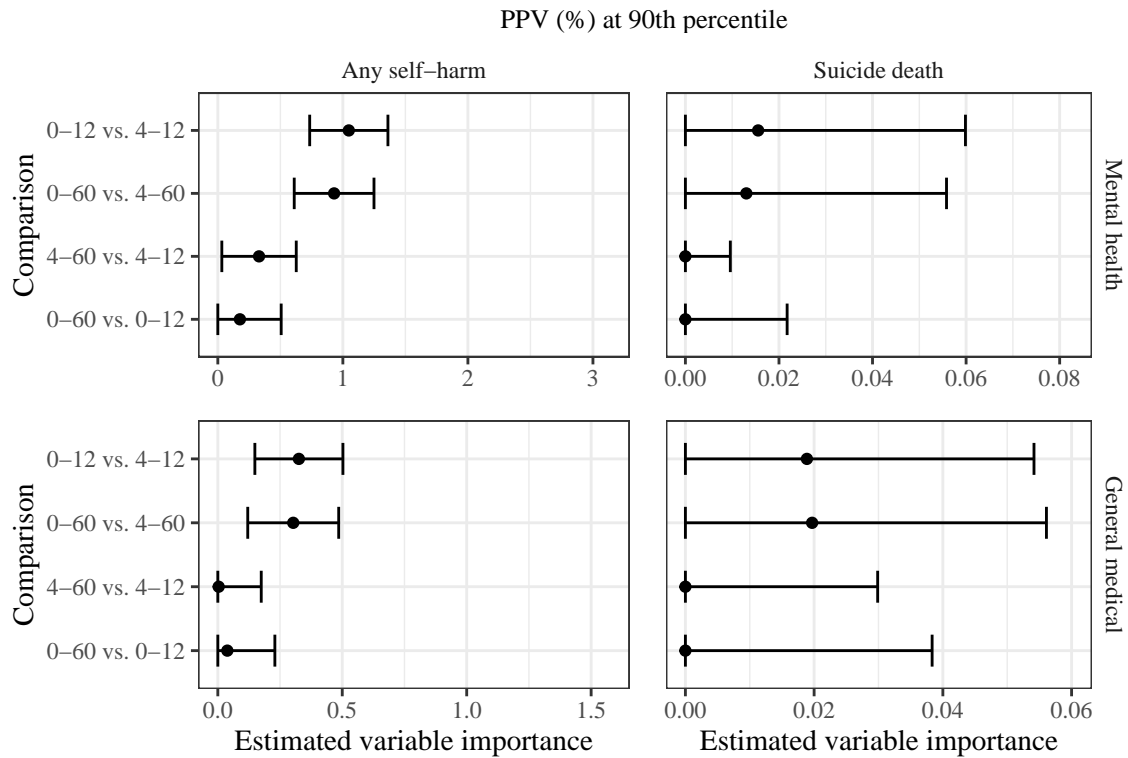

**Figure S3:** Estimated variable importance for temporal predictor groups in terms of **PPV at the 90th percentile** of risk scores. Note the different *x*-axis scales for each outcome-setting pair, which are based on the estimated maximum possible variable importance (see Supplementary Material for details).

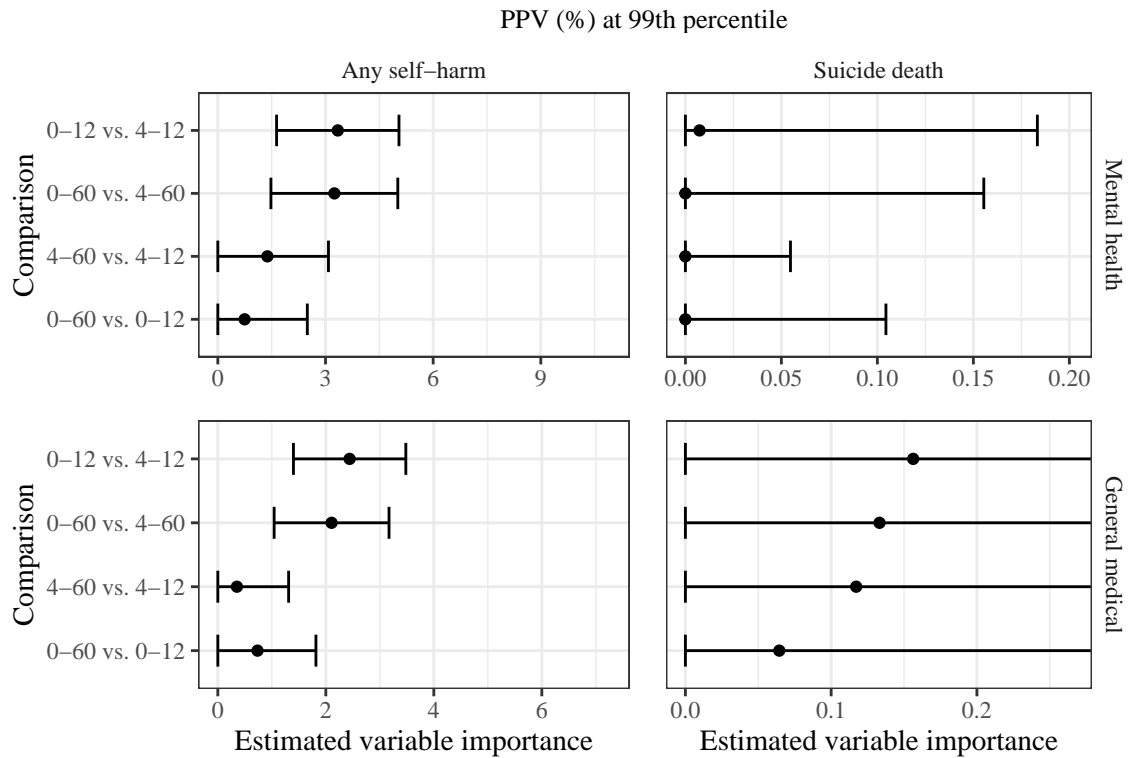

**Figure S4:** Estimated variable importance for temporal predictor groups in terms of **PPV at the 99th percentile** of risk scores. Note the different  $x$ -axis scales for each outcome-setting pair, which are based on the estimated maximum possible variable importance (see Supplementary Material for details).

It is made available under a [CC-BY-NC-ND 4.0 International license](https://creativecommons.org/licenses/by-nc-nd/4.0/).

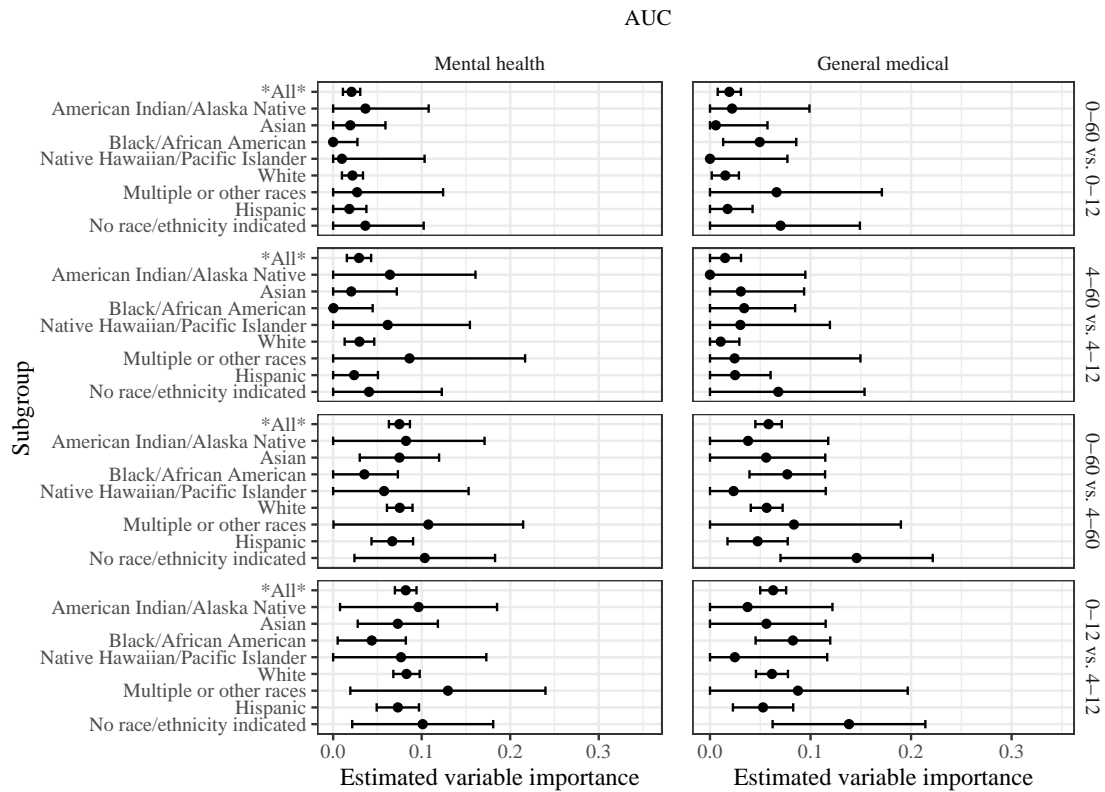

**Figure S5:** Estimated variable importance for temporal predictor groups in terms of AUC, stratified by race and ethnicity.

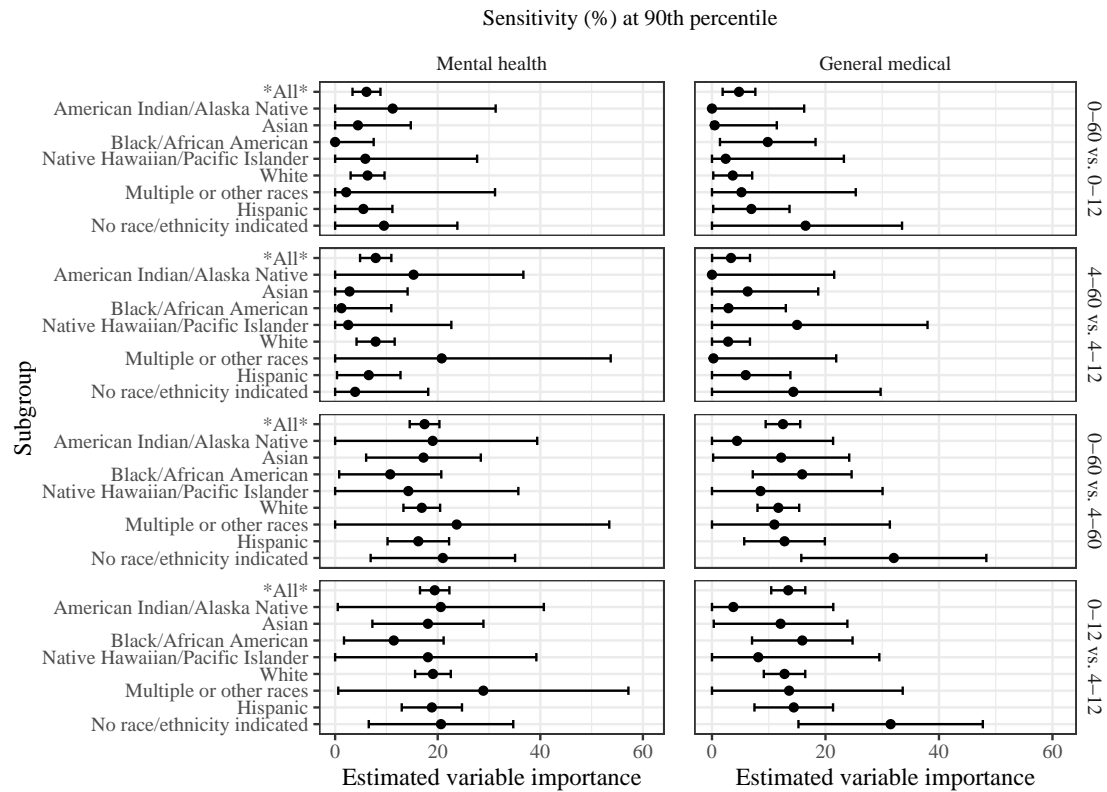

**Figure S6:** Estimated variable importance for temporal predictor groups in terms of **sensitivity at the 90th percentile** of risk scores, stratified by race and ethnicity.



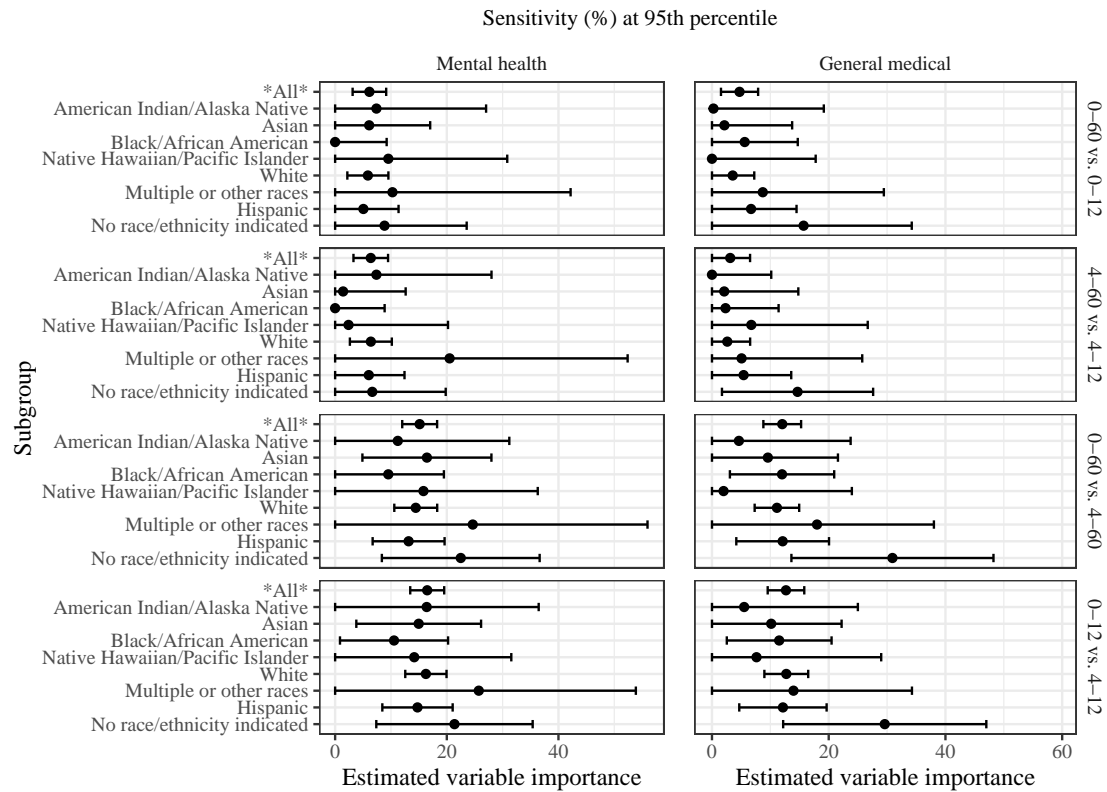

**Figure S7:** Estimated variable importance for temporal predictor groups in terms of **sensitivity at the 95th percentile** of risk scores, stratified by race and ethnicity.

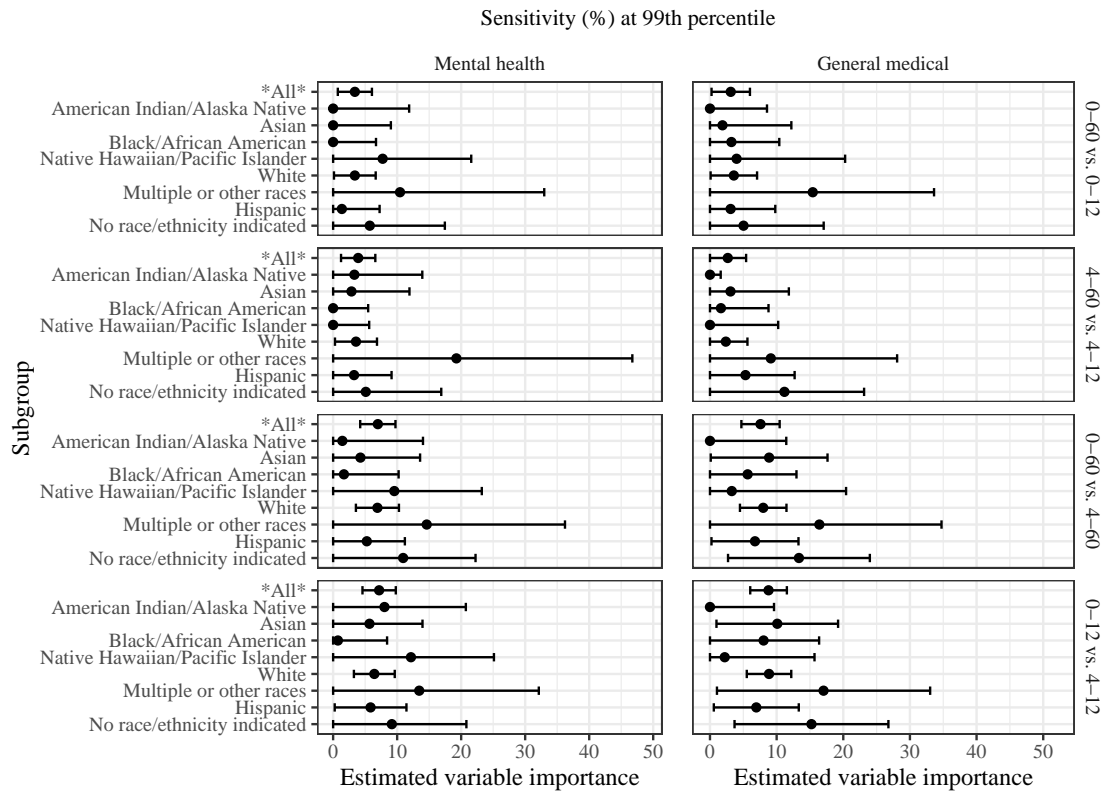

**Figure S8:** Estimated variable importance for temporal predictor groups in terms of **sensitivity at the 99th percentile** of risk scores, stratified by race and ethnicity.
